# Supplementary material for: Binary and ternary transition metal phosphides for dry reforming of methane
Source: Royal Society of Chemistry journal article supplement (doi:10.1039/d0re00027b), 2020-01-01
Supplement: d0re00027b1.pdf [file d0re00027b1.pdf]

## Supplemental materials

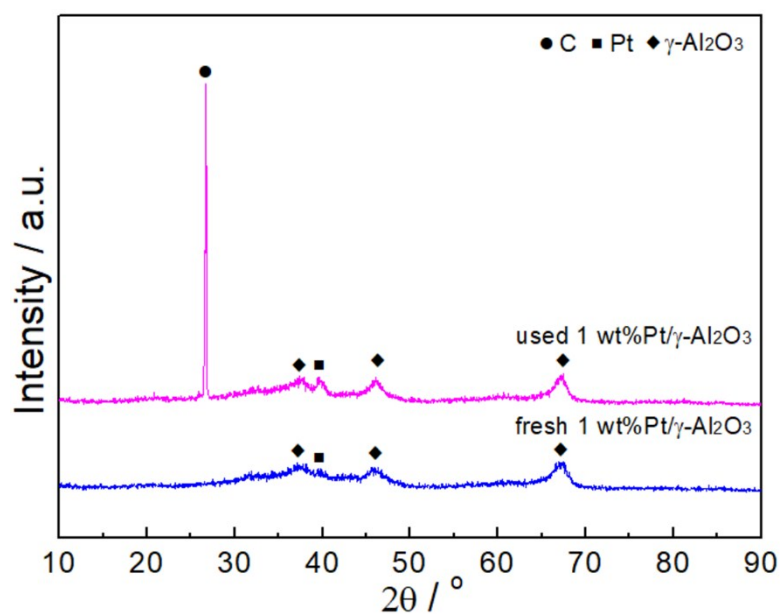

Fig. S1 XRD patterns of fresh and used Pt/ $\gamma$ -Al<sub>2</sub>O<sub>3</sub> catalysts.
